# Supplementary material for: The influence of axial fluorination of SubPc on the photoresponse performances of small-molecule organic photodiodes
Source: Royal Society of Chemistry journal article supplement (doi:10.1039/d2tc03384d), 2022-01-01
Supplement: d2tc03384d1.pdf [file d2tc03384d1.pdf]

## Supporting Information for

# Influence of axial fluorination of SubPc on photoresponse performances of organic small- molecule photodiodes

*Feifei Fang<sup>1</sup>, Daiki Minami<sup>2</sup>, Sungyoung Yun<sup>1</sup>, Chul-Joon Heo<sup>1</sup>, Hiromasa Shibuya<sup>1</sup>, Hyerim Hong<sup>1</sup>, Byoungki Choi<sup>1</sup>, Kyung-Bae Park<sup>1\*</sup>*

*\*Corresponding author. Email: myshkin.park@samsung.com*

### **This file includes:**

Figures S1 to S5

Tables S1 to S2

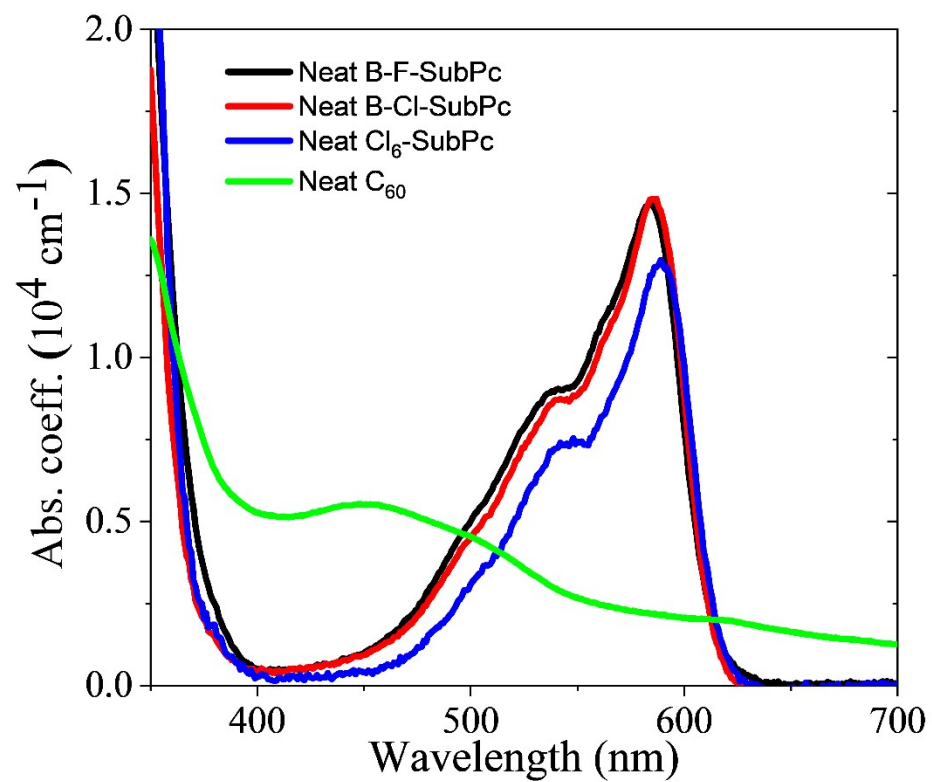

**Figure S1.** Absorption profiles of neat B-F-SubPc, B-Cl-SubPc,  $\text{C}_{60}$ , and  $\text{Cl}_6$ -SubPc films.

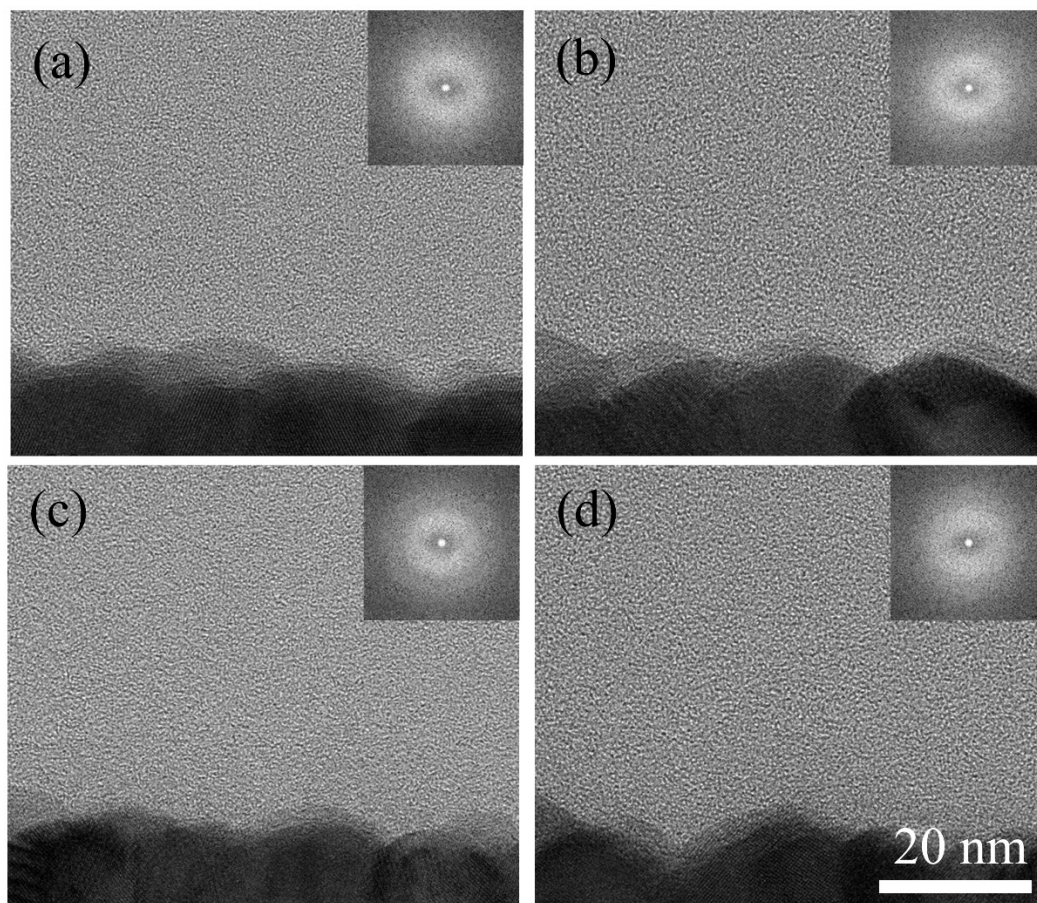

**Figure S2.** High resolution transmission electron microscopy (HR-TEM) images of sectional cross view of active layers for (a) B-Cl-SubPc+C<sub>60</sub>, (b) B-F-SubPc+C<sub>60</sub>, (c) B-Cl-SubPc+Cl<sub>6</sub>-SubPc, and (d) B-F-SubPc+Cl<sub>6</sub>-SubPc blends. The insets indicate Fast-Fourier transforms of selected region of the corresponding image.

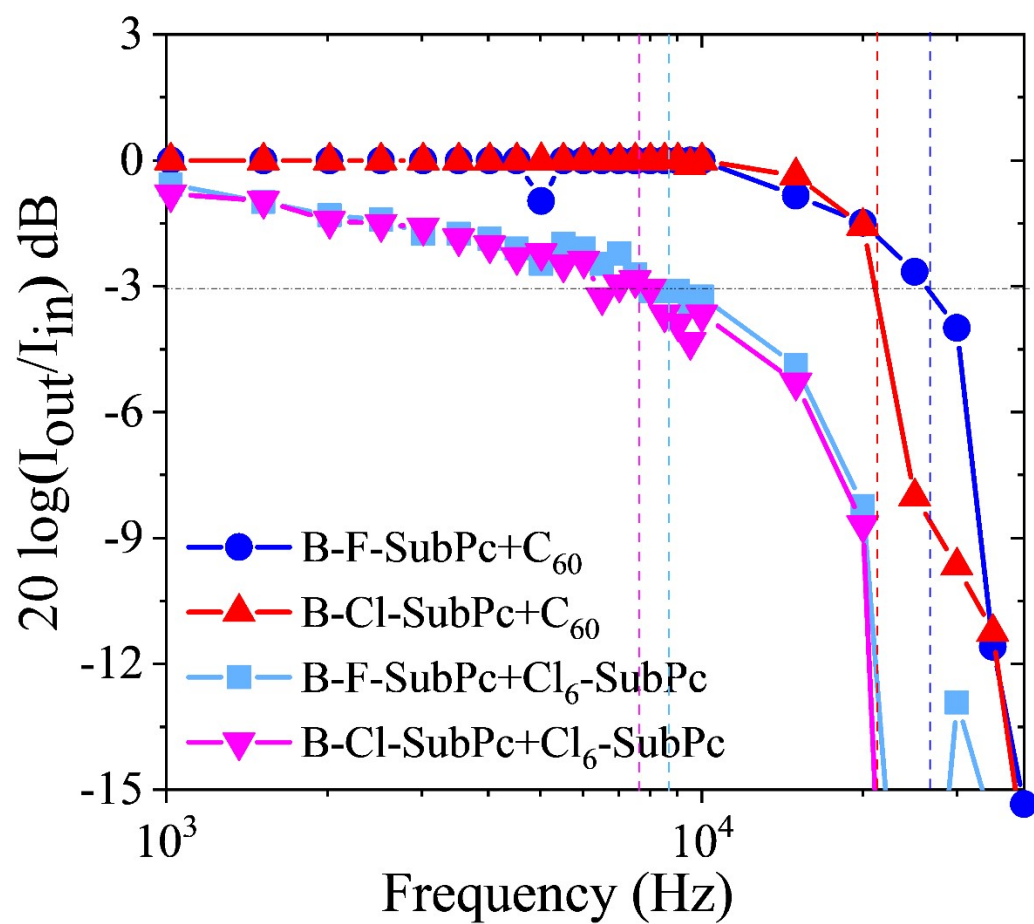

**Fig S3** Frequency-dependent photoresponse curves under zero bias (light intensity = 1 mW/cm<sup>2</sup>, wavelength = 553 nm)

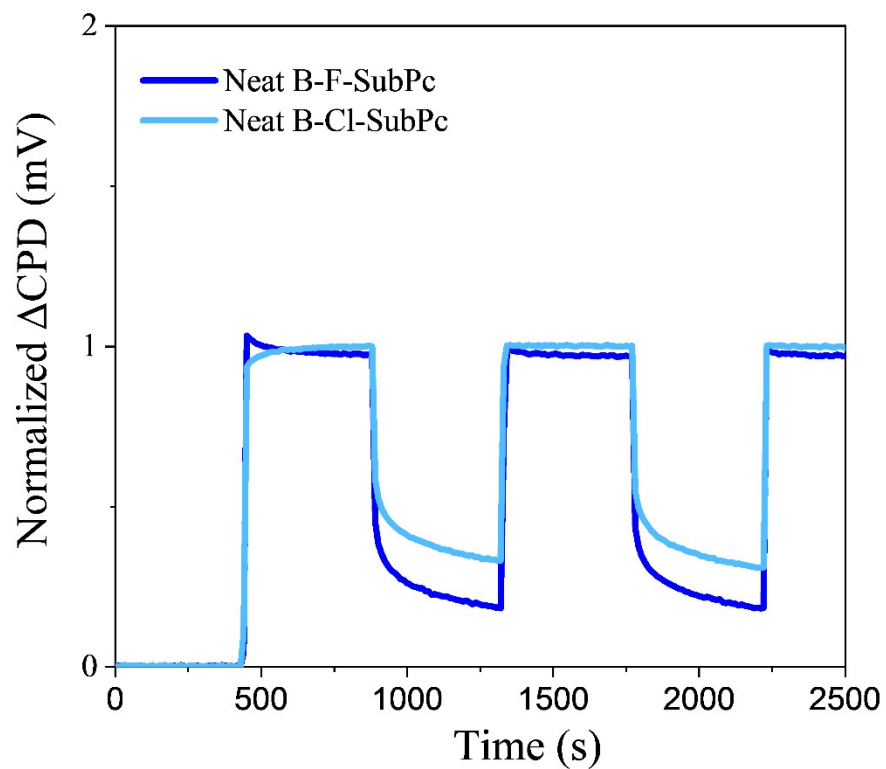

**Figure S4.** Normalized surface photovoltage plot as a function of time for isolated B-F-SubPc and B-Cl-SubPc films deposited on an EBL/Ag substrate (light: 545 nm, duration of dark/illuminated conditions: 400 s).

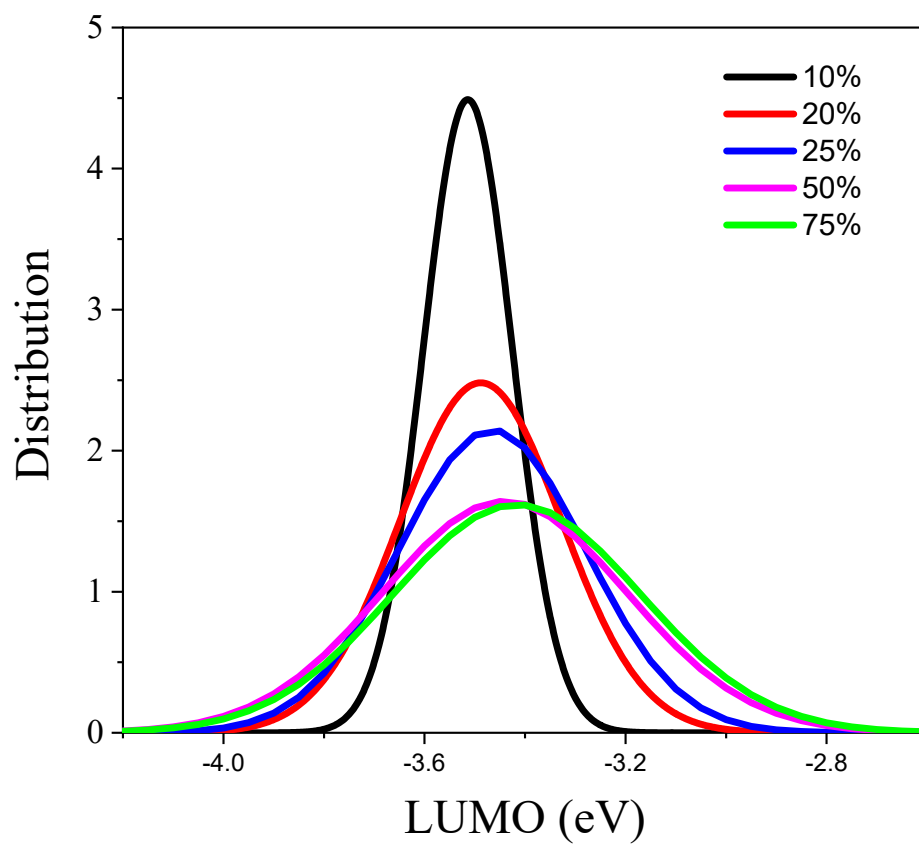

**Figure S5.** Simulated energy distribution of the LUMO for C<sub>60</sub> in a blend with different mixing ratios of B-Cl-SubPc.

**Table S1.**

Optoelectronic properties of fabricated BHJ blend films

| Blend<br>(Donor+Acceptor)          | film<br>$\lambda_{\max}$<br>(nm) | FWHM<br>(nm) | Absorption coefficient<br>( $\alpha$ , $10^4 \text{ cm}^{-1}$ ) |
|------------------------------------|----------------------------------|--------------|-----------------------------------------------------------------|
| B-F-SubPc+C <sub>60</sub>          | 577                              | 88           | 7.0                                                             |
| B-Cl-SubPc+C <sub>60</sub>         | 581                              | 82           | 6.9                                                             |
| B-F-SubPc+Cl <sub>6</sub> -SubPc   | 578                              | 110          | 11.37                                                           |
| B-Cl-SubPc+ Cl <sub>6</sub> -SubPc | 581                              | 106          | 12.72                                                           |

**Table S2.**

Average electron hopping rates ( $k_{nn}$ ) for dimers of donor-donor molecules and percentages of molecular pairs with a low hopping rate (defined as  $\log(k_{nn}) < 6$ ) in morphologies of BHJ layers obtained by DFT calculations.

| Donor      | Acceptor               | $k_{nn} / 10^{13}$ | Low-hopping-rate pairs [%] |
|------------|------------------------|--------------------|----------------------------|
| B-F-SubPc  | Cl <sub>6</sub> -SubPc | 0.23               | 15.5                       |
| B-Cl-SubPc | Cl <sub>6</sub> -SubPc | 0.60               | 14.5                       |
| B-F-SubPc  | C <sub>60</sub>        | 1.3                | 5.0                        |
| B-Cl-SubPc | C <sub>60</sub>        | 1.1                | 10.0                       |
